# Supplementary material for: piggyBac is an effective tool for functional analysis of the Plasmodium falciparum genome
Source: PubMed Central journal article supplement (PMC2686711; doi:10.1186/1471-2180-9-83), 2009-05-07
Supplement: 1471-2180-9-83-S2.pdf [file 1471-2180-9-83-S2.pdf]

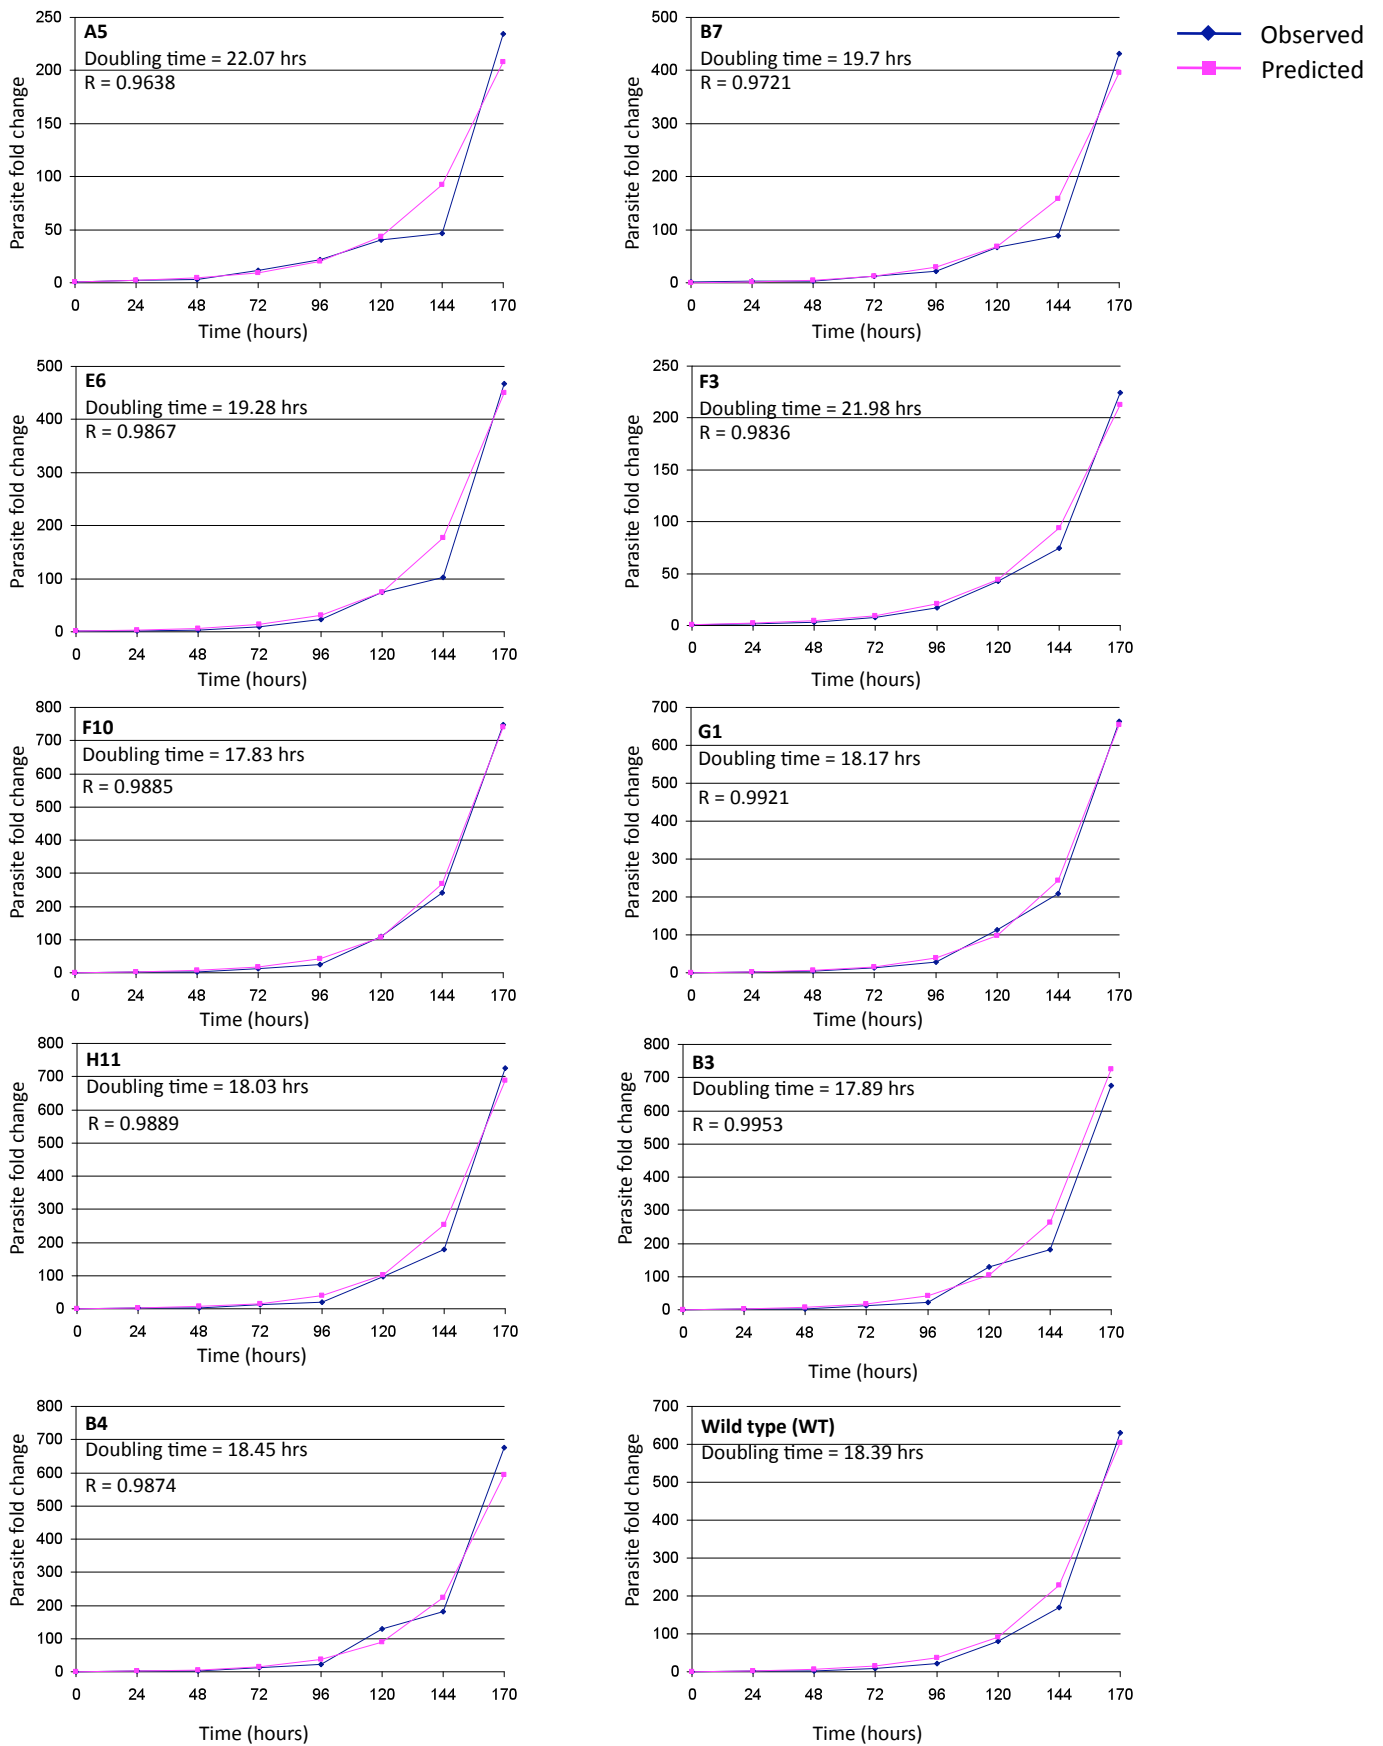

**Figure S1: Best-fit growth curve model for doubling time estimation of mutant clones.** The predicted best-fit and observed growth curves for each parasite clone is shown.
